# Supplementary material for: Disentangling evolutionary signals: conservation, specificity determining positions and coevolution. Implication for catalytic residue prediction
Source: PubMed Central journal article supplement (PMC3515339; doi:10.1186/1471-2105-13-235), 2012-09-14
Supplement: 1471-2105-13-235-S1.pdf [file 1471-2105-13-235-S1.pdf]

**Supplementary Table 1: Spearman rank correlation between methods and their standard deviation.**

|          | SDPfox62  | XDET50    | ivET62    | ivET100   | cMI62     | cMI100    | rvET62    | ivET100   | cons |
|----------|-----------|-----------|-----------|-----------|-----------|-----------|-----------|-----------|------|
| SDPfox62 | 1         |           |           |           |           |           |           |           |      |
| XDET50   | 0.34±0.2  | 1         |           |           |           |           |           |           |      |
| ivET62   | 0.10±0.13 | 0.22±0.13 | 1         |           |           |           |           |           |      |
| ivET100  | 0.07±0.14 | 0.08±0.13 | 0.21±0.21 | 1         |           |           |           |           |      |
| cMI62    | 0.16±0.26 | 0.26±0.21 | 0.17±0.18 | 0.04±0.16 | 1         |           |           |           |      |
| cMI100   | 0.16±0.27 | 0.28±0.21 | 0.18±0.19 | 0.05±0.18 | 0.76±0.15 | 1         |           |           |      |
| rvET62   | 0.23±0.16 | 0.38±0.15 | 0.41±0.24 | 0.14±0.26 | 0.36±0.23 | 0.38±0.21 | 1         |           |      |
| rvET100  | 0.26±0.17 | 0.38±0.15 | 0.41±0.22 | 0.21±0.29 | 0.36±0.22 | 0.41±0.20 | 0.93±0.10 | 1         |      |
| cons     | 0.05±0.12 | 0.31±0.16 | 0.44±0.17 | 0.17±0.22 | 0.16±0.22 | 0.16±0.19 | 0.74±0.15 | 0.73±0.15 | 1    |
