# Supplementary material for: Disentangling evolutionary signals: conservation, specificity determining positions and coevolution. Implication for catalytic residue prediction
Source: PubMed Central journal article supplement (PMC3515339; doi:10.1186/1471-2105-13-235), 2012-09-14
Supplement: 1471-2105-13-235-S3.pdf [file 1471-2105-13-235-S3.pdf]

Supplementary figure 1:

Distribution of the number of Pfam families vs number of sequences per family.

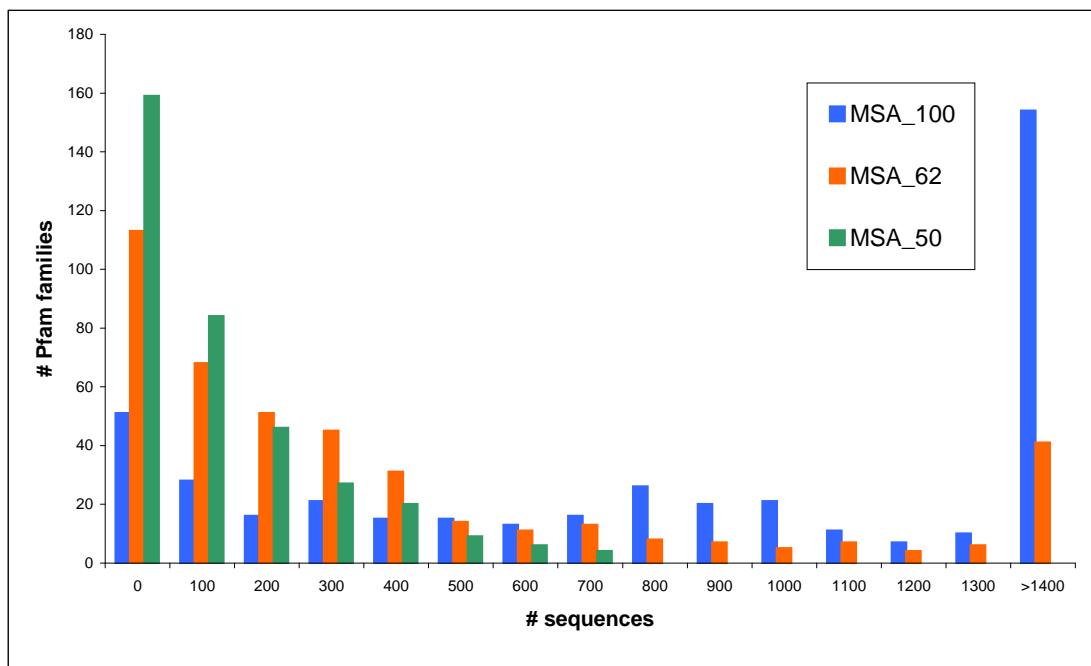

| # of sequences | MSA_100 | MSA_62 | MSA_50 |
|----------------|---------|--------|--------|
| 0              | 51      | 113    | 159    |
| 100            | 28      | 68     | 84     |
| 200            | 16      | 51     | 46     |
| 300            | 21      | 45     | 27     |
| 400            | 15      | 31     | 20     |
| 500            | 15      | 14     | 9      |
| 600            | 13      | 11     | 6      |
| 700            | 16      | 13     | 4      |
| 800            | 26      | 8      | 0      |
| 900            | 20      | 7      | 0      |
| 1000           | 21      | 5      | 0      |
| 1100           | 11      | 7      | 0      |
| 1200           | 7       | 4      | 0      |
| 1300           | 10      | 6      | 0      |
| >1400          | 154     | 41     | 0      |
